# Supplementary material
Source: PubMed Central journal article supplement (PMC8154635)
Supplement: NIHMS1654893-supplement-mmc1.pdf [file NIHMS1654893-supplement-mmc1.pdf]

## Item S1. Supplemental Methods

The e-Literacy Survey was developed for use in the CRIC ancillary study "*Is there a digital divide in chronic kidney disease?*" and consisted of 19 questions, 11 of which were developed de novo by CRIC ancillary investigators and were not piloted. The eight questions that composed the validated eHealth Literacy Scale (eHEALS) had been tested and validated in several cohorts.<sup>1,2</sup>

The mHealth/Technology Use Survey was developed to inform future research in the CRIC Study that intended to collect data from participants, at their homes and elsewhere. To assist in the design of and planning efforts for this future research, CRIC investigators and staff wanted to collect information about the willingness of participants to allow home data collection, along with the availability and use of certain types of technology. With this in mind, CRIC investigators drafted a brief questionnaire that was based on research activities being considered and not specifically on existing research, and this questionnaire was then vetted by several CRIC groups, including the Executive Committee, Recruitment and Retention Committee, Pilot Studies Committee, and the Measurements/Quality Control Committee. The survey was then piloted among CRIC research staff. All seven clinical centers were asked to offer the survey to the first 60 consecutive participants.

For both surveys, potential participants were approached by the CRIC research coordinator at the time of an annual clinic visit and the survey was self-administered. If the clinic visit was completed as a phone visit, the survey was administered to the participant over the phone by the research coordinator. Please see below for full text of both surveys.

## CRIC e-LITERACY QUESTIONNAIRE

Please answer the following questions about your experience using the Internet and mobile devices. For each question, please choose the answer that best reflects your opinion and experience *right now*.

|                                                                                                                     |                                                                                                                                                                                                                                                                                                                                                                                                                                                                                                                                                                                                                                                                                                                                                                                                                         |
|---------------------------------------------------------------------------------------------------------------------|-------------------------------------------------------------------------------------------------------------------------------------------------------------------------------------------------------------------------------------------------------------------------------------------------------------------------------------------------------------------------------------------------------------------------------------------------------------------------------------------------------------------------------------------------------------------------------------------------------------------------------------------------------------------------------------------------------------------------------------------------------------------------------------------------------------------------|
| <b>Internet use:</b>                                                                                                |                                                                                                                                                                                                                                                                                                                                                                                                                                                                                                                                                                                                                                                                                                                                                                                                                         |
| 1. Thinking about the typical month, which statement best describes your use of the internet?                       | <input type="checkbox"/> I do not have access to the Internet.<br><input type="checkbox"/> I have access to the Internet, but I never use the Internet.<br><input type="checkbox"/> I use the Internet at least once a month. I use the Internet at least once a week.<br><input type="checkbox"/> I use the Internet at least once a day.                                                                                                                                                                                                                                                                                                                                                                                                                                                                              |
| 2. During a typical month, which of the following devices do you use to access the Internet? (Check all that apply) | <input type="checkbox"/> Other<br><input type="checkbox"/> I do not use the Internet<br><input type="checkbox"/> Computer<br><input type="checkbox"/> Cell or mobile phone<br><input type="checkbox"/> Mobile device other than phone (tablet, iPad)<br><input type="checkbox"/> Other                                                                                                                                                                                                                                                                                                                                                                                                                                                                                                                                  |
| a. If Other, please specify:                                                                                        | _____                                                                                                                                                                                                                                                                                                                                                                                                                                                                                                                                                                                                                                                                                                                                                                                                                   |
| 3. Which of the following do you use the Internet for? (Check all that apply)                                       | <input type="checkbox"/> I do not use the Internet<br><input type="checkbox"/> Email<br><input type="checkbox"/> Working activities<br><input type="checkbox"/> Accessing my personal medical record<br><input type="checkbox"/> Looking up general health information<br><input type="checkbox"/> Looking up specific health information about my own health conditions<br><input type="checkbox"/> Looking up other information (for example, news, weather, entertainment)<br><input type="checkbox"/> Social networking (for example, Facebook, Twitter)<br><input type="checkbox"/> Financial transactions or management (for example, online banking)<br><input type="checkbox"/> Shopping<br><input type="checkbox"/> Online classes<br><input type="checkbox"/> Playing Games<br><input type="checkbox"/> Other |
| a. If Other, please specify:                                                                                        | _____                                                                                                                                                                                                                                                                                                                                                                                                                                                                                                                                                                                                                                                                                                                                                                                                                   |
| <b>Phone Use:</b>                                                                                                   |                                                                                                                                                                                                                                                                                                                                                                                                                                                                                                                                                                                                                                                                                                                                                                                                                         |

|                                                                                                                                                                                                                                         |                                                                                                                                                                                                                                                                                                                                                                                                                                                                                                                                                                          |
|-----------------------------------------------------------------------------------------------------------------------------------------------------------------------------------------------------------------------------------------|--------------------------------------------------------------------------------------------------------------------------------------------------------------------------------------------------------------------------------------------------------------------------------------------------------------------------------------------------------------------------------------------------------------------------------------------------------------------------------------------------------------------------------------------------------------------------|
| 4. Do you currently have a landline phone (also called a house phone) where you live?                                                                                                                                                   | Yes No                                                                                                                                                                                                                                                                                                                                                                                                                                                                                                                                                                   |
| 5. Do you currently use a personal cell/mobile phone?                                                                                                                                                                                   | Yes No                                                                                                                                                                                                                                                                                                                                                                                                                                                                                                                                                                   |
| 6. What type of cell/mobile phone do you primarily use?                                                                                                                                                                                 | <input type="checkbox"/> I do not use a cell/mobile phone<br><input type="checkbox"/> Traditional cell/mobile phone (for example, a flip phone)<br><input type="checkbox"/> Smartphone (for example, Android, iPhone, BlackBerry)<br><input type="checkbox"/> Other                                                                                                                                                                                                                                                                                                      |
| a. If Other, please specify:                                                                                                                                                                                                            | _____                                                                                                                                                                                                                                                                                                                                                                                                                                                                                                                                                                    |
| 7. Which of the following do you use your cell/mobile phone for? (Check all that apply)                                                                                                                                                 | <input type="checkbox"/> I do not use a cell/mobile phone<br><input type="checkbox"/> Send and receive phone calls<br><input type="checkbox"/> Send and receive text messages<br><input type="checkbox"/> Internet<br><input type="checkbox"/> Social networking (e.g., Facebook, Twitter)<br><input type="checkbox"/> Download apps<br><input type="checkbox"/> Email<br><input type="checkbox"/> Camera and video<br><input type="checkbox"/> Play games<br><input type="checkbox"/> Other                                                                             |
| a. If other, please specify:                                                                                                                                                                                                            | _____                                                                                                                                                                                                                                                                                                                                                                                                                                                                                                                                                                    |
| 8. Which of the following types of health apps have you use on your cell/mobile phone? (Check all that apply)                                                                                                                           | <input type="checkbox"/> I have never used a health app<br><input type="checkbox"/> Track my exercise activity or my weight<br><input type="checkbox"/> Track my eating<br><input type="checkbox"/> Look up nutrition or diet information<br><input type="checkbox"/> Learn about my health conditions<br><input type="checkbox"/> Record my blood pressures<br><input type="checkbox"/> Record my blood sugars<br><input type="checkbox"/> Access my personal medical record<br><input type="checkbox"/> Keep track of my medications<br><input type="checkbox"/> Other |
| a. If Other, please specify:                                                                                                                                                                                                            | _____                                                                                                                                                                                                                                                                                                                                                                                                                                                                                                                                                                    |
| <b><u>eHEALS Survey</u></b>                                                                                                                                                                                                             |                                                                                                                                                                                                                                                                                                                                                                                                                                                                                                                                                                          |
| The following set of questions will improve our understanding of how materials on the Internet might be made more useful to patients. <u>Regardless of whether you have access to the Internet</u> , please answer the questions below. |                                                                                                                                                                                                                                                                                                                                                                                                                                                                                                                                                                          |
| 9. How <b>useful</b> do you feel the Internet is in helping you in making decisions about your health?                                                                                                                                  | <input type="checkbox"/> Not useful at all<br><input type="checkbox"/> Not useful<br><input type="checkbox"/> Unsure<br><input type="checkbox"/> Useful<br><input type="checkbox"/> Very Useful                                                                                                                                                                                                                                                                                                                                                                          |

|                                                                                                                                                                                                                                                                                                                                                                                                       |                                                                                                                                                                                                                                    |
|-------------------------------------------------------------------------------------------------------------------------------------------------------------------------------------------------------------------------------------------------------------------------------------------------------------------------------------------------------------------------------------------------------|------------------------------------------------------------------------------------------------------------------------------------------------------------------------------------------------------------------------------------|
| <p>10. How <b>important</b> is it for you to be able to access health resources on the Internet?</p>                                                                                                                                                                                                                                                                                                  | <p><input type="checkbox"/> Not important at all<br/> <input type="checkbox"/> Not important<br/> <input type="checkbox"/> Unsure<br/> <input type="checkbox"/> Important<br/> <input type="checkbox"/> Very important</p>         |
| <p>Thanks so much for your responses. Now, we'd like you to read each of the statements below and indicate your level of agreement or disagreement with them. For each statement, would you say you strongly agree, somewhat agree, neither agree nor disagree, somewhat disagree or strongly disagree? Again, please be honest and choose the option that most accurately reflects your opinion.</p> |                                                                                                                                                                                                                                    |
| <p>11. I know <b>what</b> health resources are available on the Internet.</p>                                                                                                                                                                                                                                                                                                                         | <p><input type="checkbox"/> Strongly Disagree<br/> <input type="checkbox"/> Disagree<br/> <input type="checkbox"/> Neither Disagree nor Agree<br/> <input type="checkbox"/> Agree<br/> <input type="checkbox"/> Strongly Agree</p> |
| <p>12. I know <b>where</b> to find helpful health resources on the Internet.</p>                                                                                                                                                                                                                                                                                                                      | <p><input type="checkbox"/> Strongly Disagree<br/> <input type="checkbox"/> Disagree<br/> <input type="checkbox"/> Neither Disagree nor Agree<br/> <input type="checkbox"/> Agree<br/> <input type="checkbox"/> Strongly Agree</p> |
| <p>13. I know <b>how</b> to find helpful health resources on the Internet.</p>                                                                                                                                                                                                                                                                                                                        | <p><input type="checkbox"/> Strongly Disagree<br/> <input type="checkbox"/> Disagree<br/> <input type="checkbox"/> Neither Disagree nor Agree<br/> <input type="checkbox"/> Agree<br/> <input type="checkbox"/> Strongly Agree</p> |
| <p>14. I know <b>how to use</b> the Internet to answer my question about health.</p>                                                                                                                                                                                                                                                                                                                  | <p><input type="checkbox"/> Strongly Disagree<br/> <input type="checkbox"/> Disagree<br/> <input type="checkbox"/> Neither Disagree nor Agree<br/> <input type="checkbox"/> Agree<br/> <input type="checkbox"/> Strongly Agree</p> |
| <p>15. I know how to use the <b>health information</b> I find on the Internet to help me.</p>                                                                                                                                                                                                                                                                                                         | <p><input type="checkbox"/> Strongly Disagree<br/> <input type="checkbox"/> Disagree<br/> <input type="checkbox"/> Neither Disagree nor Agree<br/> <input type="checkbox"/> Agree<br/> <input type="checkbox"/> Strongly Agree</p> |
| <p>16. I have the skills I need to <b>evaluate</b> the health resources I find on the Internet.</p>                                                                                                                                                                                                                                                                                                   | <p><input type="checkbox"/> Strongly Disagree<br/> <input type="checkbox"/> Disagree<br/> <input type="checkbox"/> Neither Disagree nor Agree<br/> <input type="checkbox"/> Agree<br/> <input type="checkbox"/> Strongly Agree</p> |
| <p>17. I can tell <b>high quality</b> health resources from low quality health resources on the Internet.</p>                                                                                                                                                                                                                                                                                         | <p><input type="checkbox"/> Strongly Disagree<br/> <input type="checkbox"/> Disagree<br/> <input type="checkbox"/> Neither Disagree nor Agree<br/> <input type="checkbox"/> Agree<br/> <input type="checkbox"/> Strongly Agree</p> |
| <p>18. I feel <b>confident</b> in using information from the Internet to make health decisions.</p>                                                                                                                                                                                                                                                                                                   | <p><input type="checkbox"/> Strongly Disagree<br/> <input type="checkbox"/> Disagree<br/> <input type="checkbox"/> Neither Disagree nor Agree<br/> <input type="checkbox"/> Agree<br/> <input type="checkbox"/> Strongly Agree</p> |
| <p><b>Potential Uses for Technology</b></p> <p>Thanks so much for your responses. We'd like to ask you one last question that will help guide the development of a new Internet or mobile phone-based health tool. Again, please answer as honestly as possible.</p>                                                                                                                                  |                                                                                                                                                                                                                                    |

|                                                                                                                                                                   |                                                                                                                                                                                                                                                                                                    |
|-------------------------------------------------------------------------------------------------------------------------------------------------------------------|----------------------------------------------------------------------------------------------------------------------------------------------------------------------------------------------------------------------------------------------------------------------------------------------------|
| <p>19. Thinking about your own health and daily schedule, please read the following statements and select those you feel apply to you: (Check all that apply)</p> | <p><input type="checkbox"/> I'd like more help remembering to take my medications.</p> <p><input type="checkbox"/> I'd like more help learning about what my medications are for.</p> <p><input type="checkbox"/> I'd like more help learning about possible side effects from my medications.</p> |
| <p>Thank you so much for your responses and your time. We value your participation and the information you've provided will be put to good use!</p>               |                                                                                                                                                                                                                                                                                                    |

### CRIC mHealth/Technology Use Survey

Thank you for your ongoing commitment to the CRIC Study. We are now planning the next phase of CRIC, and we would like to get input from you and other CRIC participants. We would like to know what you think about using technology and devices at home to collect information in the next phase of CRIC. This may involve using computers, smart phones, other types of hand-held devices, or devices worn on your wrist or chest to better capture different types of information about your health. Your responses to these questions will not commit you to doing any of these possible activities.

Please answer the following questions by checking yes or no.

|                                                                                           | Yes | No |
|-------------------------------------------------------------------------------------------|-----|----|
| Did the participant agree to complete the questionnaire?                                  |     |    |
| 1. Do you use the Internet?                                                               |     |    |
| 2. Do you use and read email?                                                             |     |    |
| 3. Do you use a smartphone (a cell phone that can access the internet such as an iPhone)? |     |    |
| 4. Are you willing to answer study questionnaires using?                                  |     |    |
| a. The internet?                                                                          |     |    |
| b. Email?                                                                                 |     |    |
| c. Smartphone?                                                                            |     |    |

Which of the following activities would you consider doing at home (the frequency of the activities would vary depending on the activity, and all devices and supplies would be given to you by the CRIC Study)?

|                                                          | Yes | No |
|----------------------------------------------------------|-----|----|
| 5. Wear an arm-band device that measures blood pressure. |     |    |

|                                                                                                                                                                                                                                                                                                                                                                      |  |  |
|----------------------------------------------------------------------------------------------------------------------------------------------------------------------------------------------------------------------------------------------------------------------------------------------------------------------------------------------------------------------|--|--|
| 6. Measure your blood pressure using a home blood pressure machine similar to what your doctor uses.                                                                                                                                                                                                                                                                 |  |  |
| 7. Wear a watch-shaped device on your wrist that measures your physical activity levels (similar to fitbit, iWatch, or Garmin device).                                                                                                                                                                                                                               |  |  |
| 8. Wear a patch (shaped like a large band-aid) on your chest that measures your heart rhythm.                                                                                                                                                                                                                                                                        |  |  |
| 9. Occasionally test a sample of your urine at home using a test strip and monitor to measure protein and other things in your urine.                                                                                                                                                                                                                                |  |  |
| 10. Occasionally use a finger-stick device to draw a drop of blood for lab tests such as your level of kidney function.                                                                                                                                                                                                                                              |  |  |
| 11. You currently visit our clinic every year to provide study information such as questionnaires and a blood draw. Would you be willing to have us collect that information at your home instead? (We may use the services of a company to perform home visits; we would monitor their performance closely to make sure it meets our highest standards of quality). |  |  |
| 12. Do you have any comments about what we have asked you in this questionnaire?                                                                                                                                                                                                                                                                                     |  |  |

**Table S1: Survey questions used to determine study outcomes.**

| Study Outcome                                                                                                                                                                                                                                                               | e-Literacy Survey Question Number | mHealth/Technology Use Survey Question Number |
|-----------------------------------------------------------------------------------------------------------------------------------------------------------------------------------------------------------------------------------------------------------------------------|-----------------------------------|-----------------------------------------------|
| Technology Use                                                                                                                                                                                                                                                              |                                   |                                               |
| Internet Use                                                                                                                                                                                                                                                                | Q1 <sup>^</sup> , Q2*, Q3*        | Q1*                                           |
| Email Use                                                                                                                                                                                                                                                                   | Q3*, Q7*                          | Q2*                                           |
| Smartphone Use                                                                                                                                                                                                                                                              | Q6*, Q7*                          | Q3*                                           |
| mHealth app Use                                                                                                                                                                                                                                                             | Q8*                               | Not applicable                                |
| Future Interest in mHealth Use                                                                                                                                                                                                                                              | Q19*                              | Q4*                                           |
| eHealth Literacy                                                                                                                                                                                                                                                            | Q11-18 <sup>#</sup>               | Not applicable                                |
| <sup>^</sup> Current use determined by use of internet at least once a month, once a week, or once a day<br><sup>*</sup> Current use determined by affirmative response<br><sup>#</sup> Responses on Likert scale of 1-5; cumulative score of ≥32 considered to be adequate |                                   |                                               |

**Table S2: Characteristics of CRIC participants who did and did not respond to the e-Literacy Survey, by question type.**

| <b>A. mHealth Questions</b> | <b>Non-Responders (n=188)</b> | <b>Responders (N=633)</b> |
|-----------------------------|-------------------------------|---------------------------|
| Race                        |                               |                           |
| Black or African American   | 117 (62%)                     | 352 (56%)                 |
| White                       | 68 (36%)                      | 252 (40%)                 |
| Other                       | 3 (2%)                        | 29 (5%)                   |
| Ethnicity                   |                               |                           |
| Hispanic or Latino          | 2 (1%)                        | 68 (11%)                  |
| Non-Hispanic or Latino      | 186 (99%)                     | 565 (89%)                 |
| Sex                         |                               |                           |
| Female                      | 62 (33%)                      | 250 (39%)                 |
| Male                        | 126 (67%)                     | 383 (61%)                 |
|                             |                               |                           |
| <b>B. eHEALS Questions</b>  | <b>Non-Responders (N=13)</b>  | <b>Responders (n=633)</b> |
| Race                        |                               |                           |
| Black or AA                 | 8 (62%)                       | 352 (56%)                 |
| White                       | 3 (23%)                       | 252 (40%)                 |
| Other                       | 2 (15%)                       | 29 (5%)                   |
| Ethnicity                   |                               |                           |
| Hispanic or Latino          | 1 (8%)                        | 68 (11%)                  |
| Non-Hispanic or Latino      | 12 (92%)                      | 565 (89%)                 |
| Sex                         |                               |                           |
| Female                      | 7 (54%)                       | 250 (39%)                 |
| Male                        | 6 (46%)                       | 383 (61%)                 |

-



Table S3: Associations of Baseline Characteristics with eHealth literacy domains.

|                                                            | Know what health resources are available on Internet | Know Where to Find Helpful Resources | Know how to Find helpful Resources | Know how to use Internet to answer my health questions | Know how to use health info I find on the Internet to help me | Have skills to evaluate health resources I find on internet | Can Distinguish High vs. low quality health resources | Feel confident using information from internet to make health decisions |
|------------------------------------------------------------|------------------------------------------------------|--------------------------------------|------------------------------------|--------------------------------------------------------|---------------------------------------------------------------|-------------------------------------------------------------|-------------------------------------------------------|-------------------------------------------------------------------------|
|                                                            | PR (95% CI)                                          | PR (95% CI)                          | PR (95% CI)                        | PR (95% CI)                                            | PR (95% CI)                                                   | PR (95% CI)                                                 | PR (95% CI)                                           | PR (95% CI)                                                             |
| <b>Age ≥65 vs. &lt;65 years</b>                            | 0.75 (0.65-0.87)                                     | 0.73 (0.63-0.85)                     | 0.72 (0.62-0.83)                   | 0.70 (0.59-0.76)                                       | 0.66 (0.57-0.75)                                              | 0.70 (0.59-0.82)                                            | 0.71 (0.59-0.86)                                      | 0.61 (0.50-0.74)                                                        |
| <b>Female vs. Male sex</b>                                 | 0.99 (0.85-1.16)                                     | 1.04 (0.90-1.22)                     | 0.93 (0.80-1.08)                   | 0.84 (0.72-0.97)                                       | 0.99 (0.86-1.15)                                              | 0.84 (0.70-1.00*)                                           | 0.97 (0.80-1.19)                                      | 0.83 (0.66-1.03)                                                        |
| <b>White vs. Non-White race</b>                            | 1.10 (0.95-1.28)                                     | 1.15 (0.99-1.34)                     | 1.19 (1.03-1.38)                   | 1.25 (1.09-1.44)                                       | 1.13 (0.98-1.31)                                              | 1.24 (1.05-1.45)                                            | 1.37 (1.13-1.66)                                      | 1.07 (0.87-1.31)                                                        |
| <b>Education level</b>                                     |                                                      |                                      |                                    |                                                        |                                                               |                                                             |                                                       |                                                                         |
| <High school                                               | REF                                                  | REF                                  | REF                                | REF                                                    | REF                                                           | REF                                                         | REF                                                   | REF                                                                     |
| ≥High school                                               | 2.03 (1.51-2.74)                                     | 2.53 (1.80-3.55)                     | 3.24 (2.21-4.75)                   | 3.58 (2.42-5.31)                                       | 2.55 (1.83-3.55)                                              | 3.81 (2.44-5.95)                                            | 3.03 (1.93-4.76)                                      | 2.71 (1.75-4.20)                                                        |
| <b>Annual Income</b>                                       |                                                      |                                      |                                    |                                                        |                                                               |                                                             |                                                       |                                                                         |
| <\$20,000                                                  | REF                                                  | REF                                  | REF                                | REF                                                    | REF                                                           | REF                                                         | REF                                                   | REF                                                                     |
| ≥\$20,000                                                  | 1.51 (1.22-1.87)                                     | 1.97 (1.54-2.51)                     | 1.97 (1.56-2.49)                   | 2.10 (1.66-2.66)                                       | 1.93 (1.53-2.44)                                              | 2.14 (1.63-2.80)                                            | 2.09 (1.53-2.84)                                      | 1.99 (1.45-2.71)                                                        |
| Don't wish to answer                                       | 1.44 (1.10-1.88)                                     | 1.79 (1.34-2.40)                     | 1.63 (1.22-2.18)                   | 1.89 (1.43-2.50)                                       | 1.79 (1.36-2.36)                                              | 1.91 (1.38-2.63)                                            | 1.87 (1.29-2.72)                                      | 1.81 (1.23-2.64)                                                        |
| <b>Health Insurance</b>                                    |                                                      |                                      |                                    |                                                        |                                                               |                                                             |                                                       |                                                                         |
| Medicaid                                                   | REF                                                  | REF                                  | REF                                | REF                                                    | REF                                                           | REF                                                         | REF                                                   | REF                                                                     |
| Medicare/VA/Private                                        | 1.09 (0.86-1.37)                                     | 1.09 (0.86-1.38)                     | 1.06 (0.84-1.32)                   | 1.14 (0.91-1.43)                                       | 1.06 (0.84-1.32)                                              | 1.10 (0.84-1.43)                                            | 1.01 (0.75-1.36)                                      | 1.02 (0.75-1.38)                                                        |
| <b>Adequate vs. Inadequate Health Literacy<sup>3</sup></b> | 1.85 (1.31-2.61)                                     | 2.56 (1.68-3.91)                     | 3.26 (2.02-5.24)                   | 3.42 (2.13-5.51)                                       | 3.06 (1.94-4.83)                                              | 3.14 (1.90-5.17)                                            | 2.70 (1.60-4.58)                                      | 3.04 (1.69-5.45)                                                        |
| <b>Disease Self-efficacy score (per SD)<sup>4</sup></b>    | 1.12 (1.01-1.24)                                     | 1.10 (0.99-1.23)                     | 1.14 (1.02-1.28)                   | 1.11 (1.00-1.23)*                                      | 1.10 (0.99-1.22)                                              | 1.19 (1.04-1.37)                                            | 1.16 (1.00-1.35)                                      | 1.22 (1.04-1.42)                                                        |
| <b>Depressive symptom score (per SD)<sup>5</sup></b>       | 0.93 (0.86-1.01)                                     | 0.97 (0.90-1.05)                     | 0.93 (0.86-1.01)                   | 0.93 (0.86-1.00)                                       | 0.96 (0.89-1.03)                                              | 0.91 (0.83-1.00*)                                           | 0.91 (0.82-1.02)                                      | 0.98 (0.88-1.08)                                                        |
| <b>Cognition score (per SD)<sup>6</sup></b>                | 1.24 (1.13-1.36)                                     | 1.43 (1.29-1.58)                     | 1.49 (1.35-1.65)                   | 1.53 (1.39-1.68)                                       | 1.46 (1.32-1.61)                                              | 1.55 (1.38-1.74)                                            | 1.51 (1.31-1.74)                                      | 1.36 (1.19-1.56)                                                        |
| <b>Social support score (per SD)<sup>7</sup></b>           | 1.15 (1.00-1.33)                                     | 1.25 (1.06-1.47)                     | 1.18 (0.99-1.39)                   | 1.22 (1.03-1.44)                                       | 1.29 (1.08-1.54)                                              | 1.24 (1.03-1.49)                                            | 1.27 (1.01-1.58)                                      | 1.11 (0.87-1.42)                                                        |
| <b>Comorbidity score</b>                                   |                                                      |                                      |                                    |                                                        |                                                               |                                                             |                                                       |                                                                         |
| 0-3                                                        | REF                                                  | REF                                  | REF                                | REF                                                    | REF                                                           | REF                                                         | REF                                                   | REF                                                                     |
| 4-6                                                        | 0.87 (0.73-1.04)                                     | 0.81 (0.69-0.96)                     | 0.79 (0.68-0.93)                   | 0.79 (0.69-0.91)                                       | 0.74 (0.64-0.85)                                              | 0.83 (0.69-0.99)                                            | 0.81 (0.65-1.02)                                      | 0.72 (0.57-0.89)                                                        |
| 7-11                                                       | 0.75 (0.61-0.93)                                     | 0.64 (0.51-0.79)                     | 0.61 (0.49-0.75)                   | 0.59 (0.48-0.72)                                       | 0.55 (0.45-0.68)                                              | 0.62 (0.49-0.79)                                            | 0.64 (0.48-0.85)                                      | 0.53 (0.40-0.72)                                                        |

<sup>1</sup>Assessed with S-TOFHLA instrument (adequate score >16, out of 36)<sup>3</sup><sup>2</sup>Assessed with modified mini-Mental State Exam (score range 0-100)<sup>6</sup><sup>3</sup>Assessed with Becks depression inventory (score range 0-63)<sup>5</sup><sup>4</sup>Assessed with disease self-efficacy<sup>4</sup> (score range 5-50); only assessed in Phase III cohort participants (N=462)<sup>5</sup>Assessed with Lubben social network scale, score range (0-30)<sup>7</sup>; only assessed in Phase III cohort participants ≥65 years of age (N=235)<sup>6</sup>Score constructed using the Charlson scoring system.<sup>8</sup>

1. Nguyen J, Moorhouse M, Curbow B, Christie J, Walsh-Childers K, Islam S. Construct Validity of the eHealth Literacy Scale (eHEALS) Among Two Adult Populations: A Rasch Analysis. *JMIR Public Health Surveill.* 2016;2:e24.
2. Norman C, Skinner H. eHEALS: The eHealth Literacy Scale. *J Med Internet Res.* 2006;8:e27.

3. Baker DW, Williams MV, Parker RM, Gazmararian JA, Nurss J. Development of a brief test to measure functional health literacy. *Patient Educ Couns*. 1999;38:33-42.
4. Lorig K, Sobel D, Ritter P, Laurent D, Hobbs M. Lorig KR, Sobel, DS, Ritter PL, Laurent, D, Hobbs, M. Effect of a self-management program for patients with chronic disease. *Effective Clinical Practice*, 4, 2001,pp. 256-262. *Effective Clinical Practice*. 2001;4:256-262.
5. Craven JL, Rodin GM, Littlefield C. The Beck Depression Inventory as a screening device for major depression in renal dialysis patients. *Int J Psychiatry Med*. 1988;18:365-374.
6. Teng EL, Chui HC. The Modified Mini-Mental State (3MS) examination. *J Clin Psychiatry*. 1987;48(8):314-318.
7. Lubben J, Blozik E, Gillmann G, et al. Performance of an abbreviated version of the Lubben Social Network Scale among three European Community-dwelling older adult populations. *Gerontologist*. 2006;46(4):503-513.
8. Charlson M, Pompei P, Ales K, MacKenzie C. A new method of classifying prognostic comorbidity in longitudinal studies: development and validation. *J Chronic Dis*. 1987;40(5):373-383.
